# Supplementary material for: Triphenylstannyl((arylimino)methyl)benzoates with selective potency that induce G1 and G2/M cell cycle arrest and trigger apoptosis via ROS in human cervical cancer cells
Source: Royal Society of Chemistry journal article supplement (doi:10.1039/c7dt04037g), 2017-12-19
Supplement: c7dt04037g1.pdf [file c7dt04037g1.pdf]

## **Electronic Supporting Information (ESI)**

**Triphenylstannyl((arylimino)methyl)benzoates with selective potency that induce G1 and G2/M cell cycle arrest and trigger apoptosis via ROS in human cervical cancer cells**

**Tushar S. Basu Baul,<sup>\*a</sup> Imliwati Longkumer, Andrew Duthie,<sup>b</sup> Priya Singh,<sup>c</sup> Biplob Koch,<sup>\*c</sup> M. Fátima C. Guedes da Silva,<sup>\*d</sup>**

*<sup>[a]</sup>Centre for Advanced Studies in Chemistry, North-Eastern Hill University, NEHU Permanent Campus, Umshing, Shillong 793 022, India; E-mail: basubaulchem@gmail.com, basubaul@nehu.ac.in; Fax: +91-3642721000; Tel: +91-3642722626*

*<sup>[b]</sup>School of Life & Environmental Science, Deakin University, Geelong, Victoria 3217, Australia*

*<sup>[c]</sup>Genotoxicology and Cancer Biology Lab, Department of Zoology, Banaras Hindu University, Varanasi, India*

*<sup>[d]</sup>Centro de Química Estrutural, Instituto Superior Técnico, Universidade de Lisboa, Av. Rovisco Pais 1, 1049-001 Lisboa, Portugal*

## Contents

1. **Table S1.** Crystal data and structure refinement details for pro-ligands **HL**<sup>3</sup>, **HL**<sup>5</sup> and **HL**<sup>6</sup>
2. **Table S2.** Crystal data and structure refinement details for triphenyltin compounds **5**, **7-11**
3. **Figure S1.**  $\pi\cdots\pi$  and C–H $\cdots\pi$  interactions in the structures of compounds **5**. Symmetry code to generate equivalent atoms: *i*) 1-x,1-y,2-z.
4. **Figure S2.**  $\pi\cdots\pi$  and C–H $\cdots\pi$  interactions in the structures of compounds **7** and **8**. Symmetry code to generate equivalent atoms: *i*) -x,1-y,-1/2+z (**7**); *i*) 1/2-x,-1/2+y,1.5-z (**8**).
5. **Figure S3.**  $\pi\cdots\pi$  and hydrogen-bond interactions in the structure of compound **9**:  $d_{O4\cdots O2} = 2.687(2)$  Å,  $\angle_{O4-H41\cdots O2} = 168(2)^\circ$ ;  $d_{O4\cdots O3} = 2.772(3)$  Å,  $\angle_{O4-H42\cdots O3} = 172(2)^\circ$ . Symmetry code to generate equivalent atoms: *i*) 2-x,2-y,1-z; *ii*) -1/2+x,1.5-y,-1/2+z; *iii*) -1+x,y,z; *iv*) 1/2+x,1.5-y,1/2+z; *v*) 1+x,y,z.
6. **Figure S4.** F $\cdots\pi$  interactions in the structure of compound **11**. Symmetry code to generate equivalent atoms: *i*) 2-x,1-y,1-z; *ii*) 1-x,-y,1-z.
7. **Figure S5.**  $\pi\cdots\pi$  and C–H $\cdots\pi$  interactions in the structure of compound **HL**<sup>3</sup>. Symmetry code to generate equivalent atoms: *i*) 2-x,1-y,1-z; *ii*) 2-x,1-y,1-z.
8. **Figure S6.** Uv-Vis absorption spectra over time for triphenyltin(IV) compounds **1** and **5** in DMSO.
9. **Figure S7.** Bar representations of dose dependent cytotoxic effects of compounds **1-11** on HeLa cells by MTT assay after incubation with various concentrations of compounds for 24 h. Bars represent  $\pm$  SEM (n = 3).
10. **Figure S8.** Bar representations of dose dependent cytotoxic effects of compounds **1-11** on MDA-MB-231 cells by MTT assay after incubation with various concentrations of compounds for 24 h. Bars represent  $\pm$  SEM (n = 3).
11. **Figure S9.** Bar representations of dose dependent cytotoxic effects of compounds **1-11** on HEK-293 cells by MTT assay after incubation with various concentrations of compounds for 24 h. Bars represent  $\pm$  SEM (n = 3).

12. **Figure S10.** Bar representations of dose dependent cytotoxic effects of  $\text{Ph}_3\text{SnOH}$  on normal cells HEK-293 and cancer cells HeLa and MDA-MB-231 by MTT assay after incubation with various concentrations of compounds for 24 h. Bars represent  $\pm$  SEM (n = 3).
13. **Figure S11.** Bar representations of dose dependent cytotoxic effects of Pro-ligands HL<sup>1</sup>-HL<sup>9</sup>, Pthalide-H and Pthalide-F on HeLa cells by MTT assay after incubation with various concentrations of compounds for 24 h. Bars represent  $\pm$  SEM (n = 3).
14. **Figure S12.** Dose-dependent generations of ROS through DCFH-DA fluorescence staining dye after 24h treatment with  $\text{IC}_{50}$  concentrations of **1** and **5** in HEK 293 cells detected by measuring the fluorescence intensity viewed through fluorescence microscope.
15. **Figure S13.** The data indicated in the histogram refers to the percentage of cells in each phase of the cell cycle.

**Table S1.** Crystal data and structure refinement details for pro-ligands **HL<sup>3</sup>**, **HL<sup>5</sup>** and **HL<sup>6</sup>**

|                                                        | <b>HL<sup>3</sup></b>                                         | <b>HL<sup>5</sup></b>                                         | <b>HL<sup>6</sup></b>                                         |
|--------------------------------------------------------|---------------------------------------------------------------|---------------------------------------------------------------|---------------------------------------------------------------|
| Empirical formula                                      | C <sub>15</sub> H <sub>13</sub> N <sub>1</sub> O <sub>2</sub> | C <sub>15</sub> H <sub>13</sub> N <sub>1</sub> O <sub>3</sub> | C <sub>16</sub> H <sub>15</sub> N <sub>1</sub> O <sub>3</sub> |
| Formula weight                                         | 239.26                                                        | 255.26                                                        | 269.29                                                        |
| Temperature (K)                                        | 298(2)                                                        | 296(2)                                                        | 298(2)                                                        |
| Crystal system                                         | Monoclinic                                                    | Orthorhombic                                                  | Triclinic                                                     |
| Space group                                            | <i>P</i> 2 <sub>1</sub> / <i>c</i>                            | <i>P</i> 2 <sub>1</sub> <i>ca</i>                             | <i>P</i> $\bar{1}$                                            |
| <i>a</i> (Å)                                           | 24.5835(17)                                                   | 6.1246(5)                                                     | 4.8722(6)                                                     |
| <i>b</i> (Å)                                           | 7.2032(5)                                                     | 57.377(4)                                                     | 7.6353(8)                                                     |
| <i>c</i> (Å)                                           | 14.2362(10)                                                   | 7.2367(4)                                                     | 19.256(2)                                                     |
| ∠ (°)                                                  | 90                                                            | 90                                                            | 92.857(9)                                                     |
| ∠ (°)                                                  | 105.711(7)                                                    | 90                                                            | 96.511(9)                                                     |
| ∠ (°)                                                  | 90                                                            | 90                                                            | 104.261(10)                                                   |
| <i>V</i> (Å <sup>3</sup> )                             | 2426.8(3)                                                     | 2543.1(3)                                                     | 687.53(14)                                                    |
| <i>Z</i>                                               | 8                                                             | 8                                                             | 2                                                             |
| <i>D</i> <sub>calc</sub> (g/cm <sup>3</sup> )          | 1.310                                                         | 1.333                                                         | 1.301                                                         |
| ∠ (mm <sup>-1</sup> )                                  | 0.087                                                         | 0.094                                                         | 0.090                                                         |
| <i>F</i> (000)                                         | 1008                                                          | 1072                                                          | 284                                                           |
| Reflections measured                                   | 11916                                                         | 13265                                                         | 5200                                                          |
| Independent reflections<br>( <i>R</i> <sub>int</sub> ) | 5568 (0.0329)                                                 | 4431 (0.1330)                                                 | 3103 (0.0312)                                                 |
| Reflection with <i>I</i> > 2σ( <i>I</i> )              | 2802                                                          | 3727                                                          | 1618                                                          |
| Number of parameters                                   | 331                                                           | 337                                                           | 184                                                           |
| <i>R</i> 1 <sup>a</sup> (□□□□□□□□)                     | 0.0610                                                        | 0.1665                                                        | 0.0857                                                        |
| <i>wR</i> 2 <sup>b</sup> (□□□□□□□□)                    | 0.1371                                                        | 0.4128                                                        | 0.2099                                                        |
| GOF ( <i>F</i> <sup>2</sup> )                          | 1.014                                                         | 1.687                                                         | 1.039                                                         |

**Table S2.** Crystal data and structure refinement details for triphenyltin compounds **5**, **7-11**

|                                                     | <b>5</b>                                           | <b>7</b>                                            | <b>8</b>                                                         | <b>9</b>                                          | <b>10</b>                                          | <b>11</b>                                           |
|-----------------------------------------------------|----------------------------------------------------|-----------------------------------------------------|------------------------------------------------------------------|---------------------------------------------------|----------------------------------------------------|-----------------------------------------------------|
| Empirical formula                                   | C <sub>33</sub> H <sub>27</sub> NO <sub>3</sub> Sn | C <sub>32</sub> H <sub>24</sub> FNO <sub>2</sub> Sn | C <sub>34</sub> H <sub>30</sub> N <sub>2</sub> O <sub>2</sub> Sn | C <sub>26</sub> H <sub>22</sub> O <sub>4</sub> Sn | C <sub>32</sub> H <sub>25</sub> NO <sub>2</sub> Sn | C <sub>32</sub> H <sub>24</sub> FNO <sub>2</sub> Sn |
| Formula weight                                      | 604.24                                             | 592.21                                              | 617.29                                                           | 517.12                                            | 574.22                                             | 592.21                                              |
| Temperature (K)                                     | 298(2)                                             | 296(2)                                              | 296(2)                                                           | 296(2)                                            | 296(2)                                             | 296(2)                                              |
| Crystal system                                      | Orthorhombic                                       | Orthorhombic                                        | Monoclinic                                                       | Monoclinic                                        | Triclinic                                          | Monoclinic                                          |
| Space group                                         | <i>Pbca</i>                                        | <i>Pca2</i> <sub>1</sub>                            | <i>P2</i> <sub>1</sub> / <i>n</i>                                | <i>P2</i> <sub>1</sub> / <i>n</i>                 | <i>P</i> <sub>1</sub> <sup>1</sup>                 | <i>P2</i> <sub>1</sub> / <i>c</i>                   |
| <i>a</i> (Å)                                        | 8.3521(3)                                          | 19.5733(7)                                          | 11.7022(6)                                                       | 10.5925(2)                                        | 9.6664(3)                                          | 26.2984(8)                                          |
| <i>b</i> (Å)                                        | 17.4627(6)                                         | 14.9548(5)                                          | 10.3673(6)                                                       | 19.0045(4)                                        | 14.5629(6)                                         | 9.5246(4)                                           |
| <i>c</i> (Å)                                        | 38.415(3)                                          | 18.3132(6)                                          | 48.186(2)                                                        | 11.3877(3)                                        | 19.7869(7)                                         | 21.8019(8)                                          |
| □ (°)                                               | 90                                                 | 90                                                  | 90                                                               | 90                                                | 101.707(3)                                         | 90                                                  |
| □ (°)                                               | 90                                                 | 90                                                  | 92.817(4)                                                        | 96.160(2)                                         | 94.317(4)                                          | 92.563(3)                                           |
| □ (°)                                               | 90                                                 | 90                                                  | 90                                                               | 90                                                | 96.279(3)                                          | 90                                                  |
| <i>V</i> (Å <sup>3</sup> )                          | 5602.8(5)                                          | 5360.5(3)                                           | 5838.8(5)                                                        | 2279.17(9)                                        | 2697.49(17)                                        | 5455.5(3)                                           |
| <i>Z</i>                                            | 8                                                  | 8                                                   | 8                                                                | 4                                                 | 4                                                  | 8                                                   |
| <i>D</i> <sub>calc</sub> (g/cm <sup>3</sup> )       | 1.433                                              | 1.468                                               | 1.404                                                            | 1.507                                             | 1.414                                              | 1.442                                               |
| <i>μ</i> (mm <sup>-1</sup> )                        | 0.946                                              | 0.989                                               | 0.908                                                            | 1.150                                             | 0.975                                              | 0.972                                               |
| <i>F</i> (000)                                      | 2448                                               | 2384                                                | 2512                                                             | 1040                                              | 1160                                               | 2384                                                |
| Reflections measured                                | 20102                                              | 14398                                               | 22687                                                            | 9877                                              | 23758                                              | 33258                                               |
| Independent reflections ( <i>R</i> <sub>int</sub> ) | 6563 (0.0366)                                      | 8091 (0.0220)                                       | 13233 (0.0965)                                                   | 5183 (0.0163)                                     | 11011 (0.0271)                                     | 12601 (0.0318)                                      |
| Reflection with <i>I</i> > 2σ( <i>I</i> )           | 5411                                               | 6716                                                | 7477                                                             | 4426                                              | 8792                                               | 9989                                                |
| Number of parameters                                | 4832                                               | 668                                                 | 707                                                              | 286                                               | 649                                                | 667                                                 |
| <i>RI</i> <sup>a</sup> ( <i>I</i> ≥ 2σ)             | 0.0618                                             | 0.0312                                              | 0.1246                                                           | 0.0246                                            | 0.0391                                             | 0.0532                                              |
| <i>wR2</i> <sup>b</sup> ( <i>I</i> ≥ 2σ)            | 0.1003                                             | 0.0646                                              | 0.2046                                                           | 0.0536                                            | 0.0771                                             | 0.0981                                              |
| GOF ( <i>F</i> <sup>2</sup> )                       | 1.159                                              | 1.079                                               | 1.154                                                            | 1.068                                             | 1.055                                              | 1.159                                               |

<sup>a</sup>  $RI = \Sigma ||F_o| - |F_c|| / \Sigma |F_o|$ . <sup>b</sup>  $wR2 = [\Sigma [w(F_o^2 - F_c^2)^2] / \Sigma [w(F_o^2)^2]]^{1/2}$

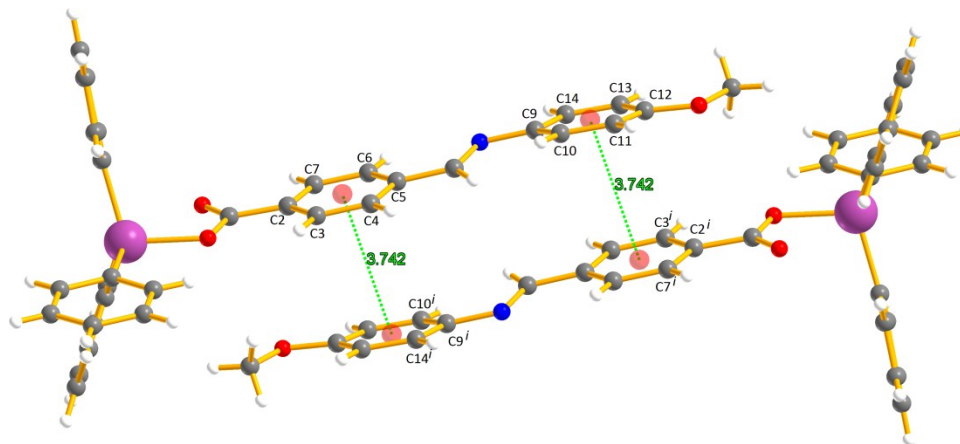

5

**Figure S1.**  $\pi \cdots \pi$  and C-H $\cdots\pi$  interactions in the structures of compounds **5**. Symmetry code to generate equivalent atoms: *i*) 1-x, 1-y, 2-z.

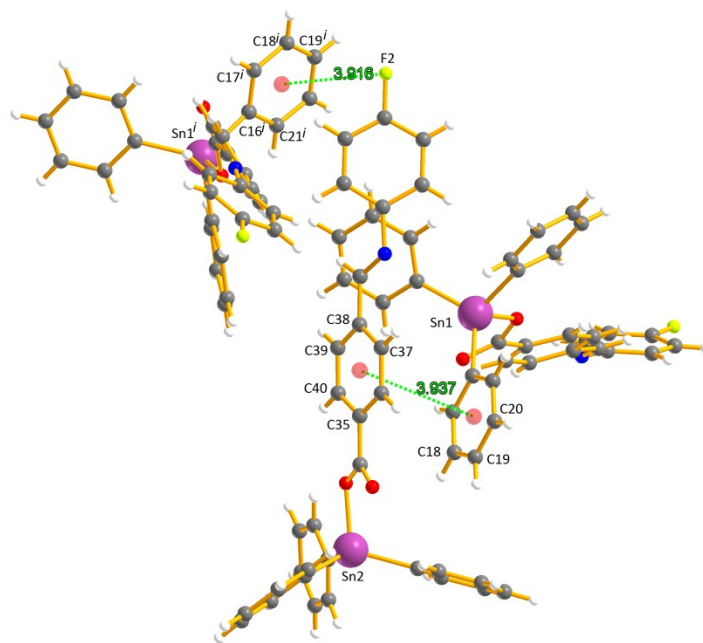

7

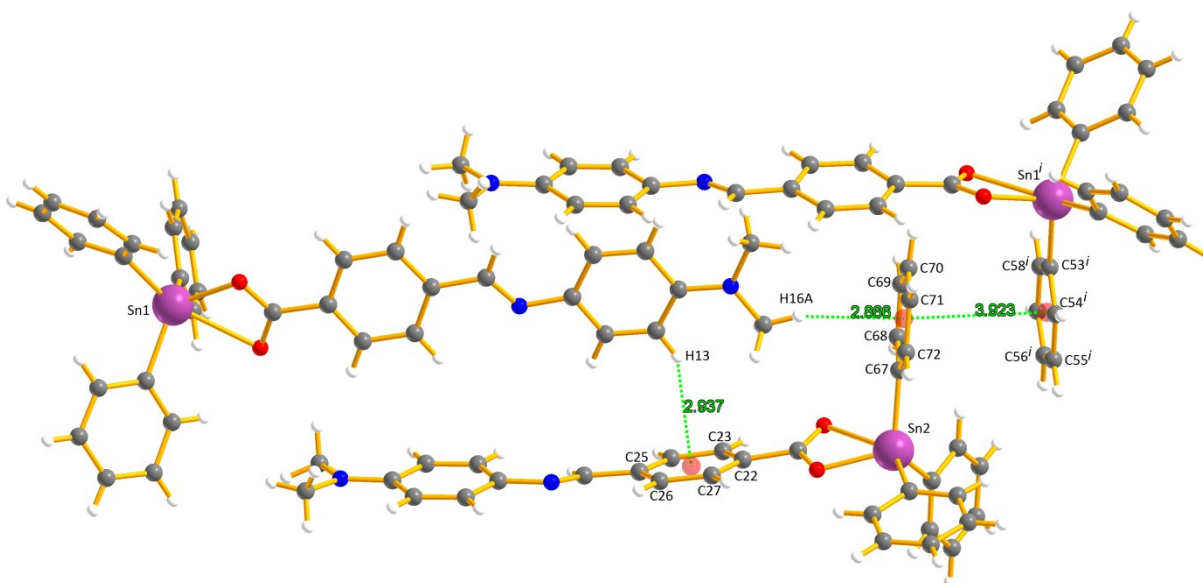

8

**Figure S2.**  $\pi \cdots \pi$  and C-H $\cdots$  $\pi$  interactions in the structures of compounds **7** and **8**. Symmetry code to generate equivalent atoms: *i*) -x,1-y,-1/2+z (**7**); *i*) 1/2-x,-1/2+y,1.5-z (**8**).

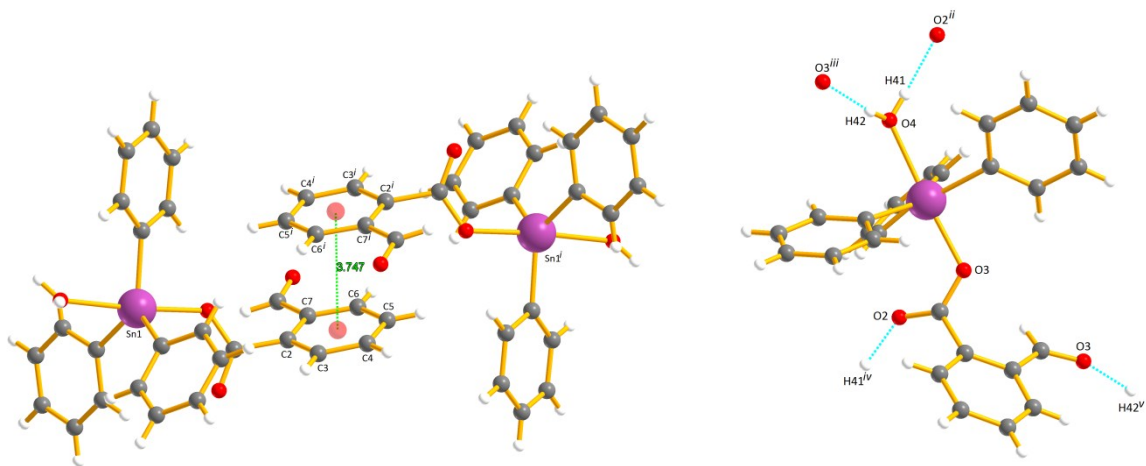

9

**Figure S3.**  $\pi \cdots \pi$  and hydrogen-bond interactions in the structure of compound **9**:  $d_{O4 \cdots O2} = 2.687(2) \text{ \AA}$ ,  $\angle_{O4-H41 \cdots O2} = 168(2)^\circ$ ;  $d_{O4 \cdots O3} = 2.772(3) \text{ \AA}$ ,  $\angle_{O4-H42 \cdots O3} = 172(2)^\circ$ . Symmetry code to generate equivalent atoms: *i*)  $2-x, 2-y, 1-z$ ; *ii*)  $-1/2+x, 1.5-y, -1/2+z$ ; *iii*)  $-1+x, y, z$ ; *iv*)  $1/2+x, 1.5-y, 1/2+z$ ; *v*)  $1+x, y, z$ .

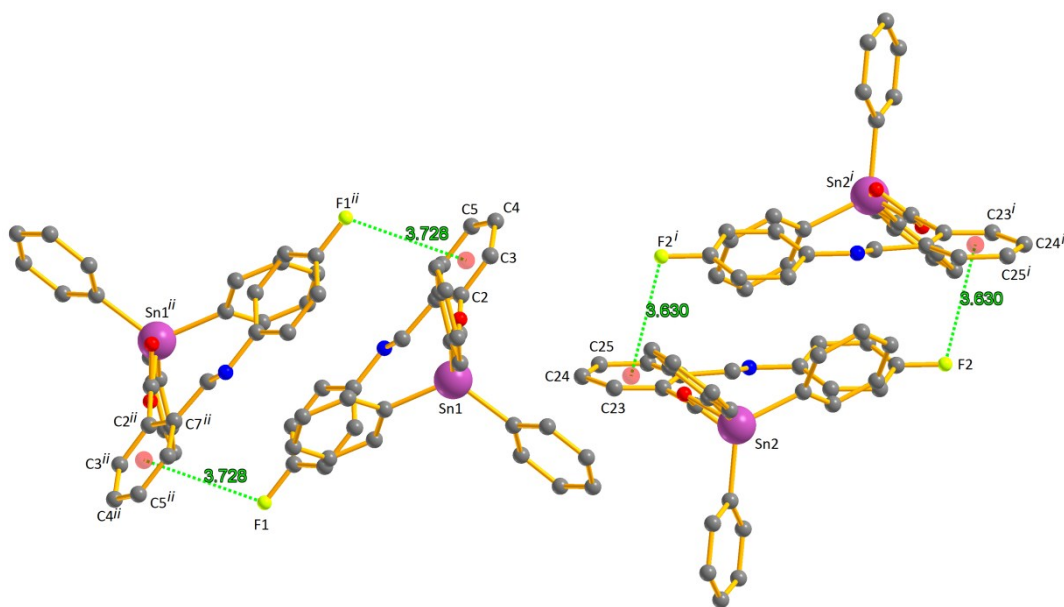

11

**Figure S4.**  $F \cdots \pi$  interactions in the structure of compound **11**. Symmetry code to generate equivalent atoms: *i*)  $2-x, 1-y, 1-z$ ; *ii*)  $1-x, -y, 1-z$ .



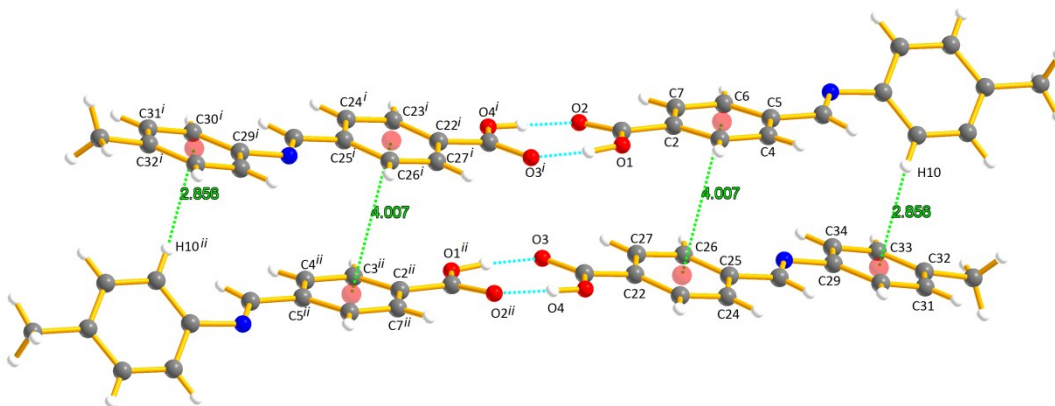

**Figure S5.**  $\pi \cdots \pi$  and C–H $\cdots\pi$  interactions in the structure of compound **HL**<sup>3</sup>. Symmetry code to generate equivalent atoms: *i*) 2-x,1-y,1-z; *ii*) 2-x,1-y,1-z.

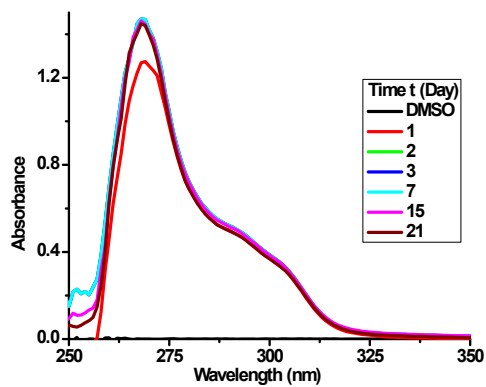

**Compound 1**

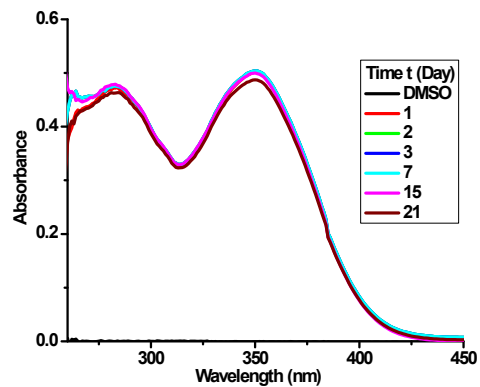

**Compound 5**

**Figure S6.** Uv-Vis absorption spectra over time for triphenyltin(IV) compounds **1** and **5** in DMSO.

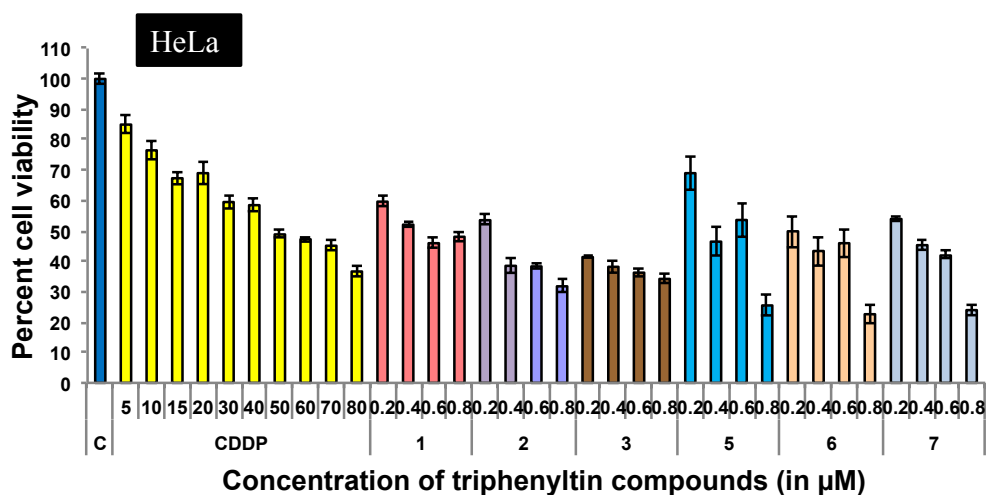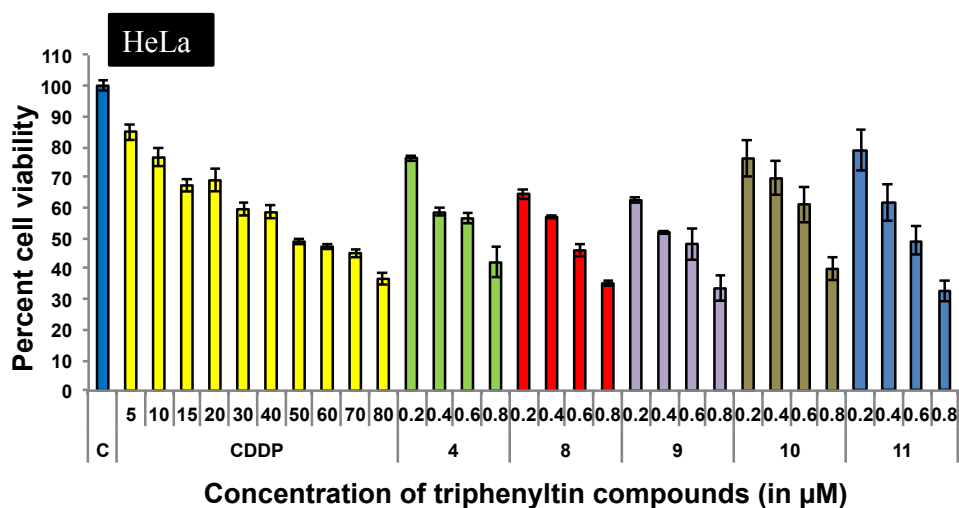

**Figure S7.** Bar representations of dose dependent cytotoxic effects of compounds 1-11 on HeLa cells by MTT assay after incubation with various concentrations of compounds for 24 h. Bars represent  $\pm$  SEM (n = 3).

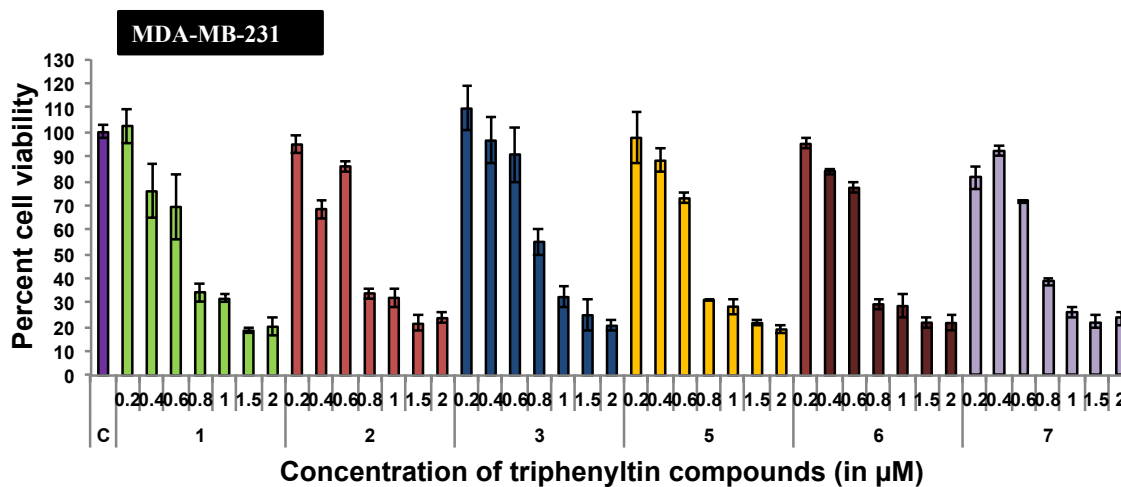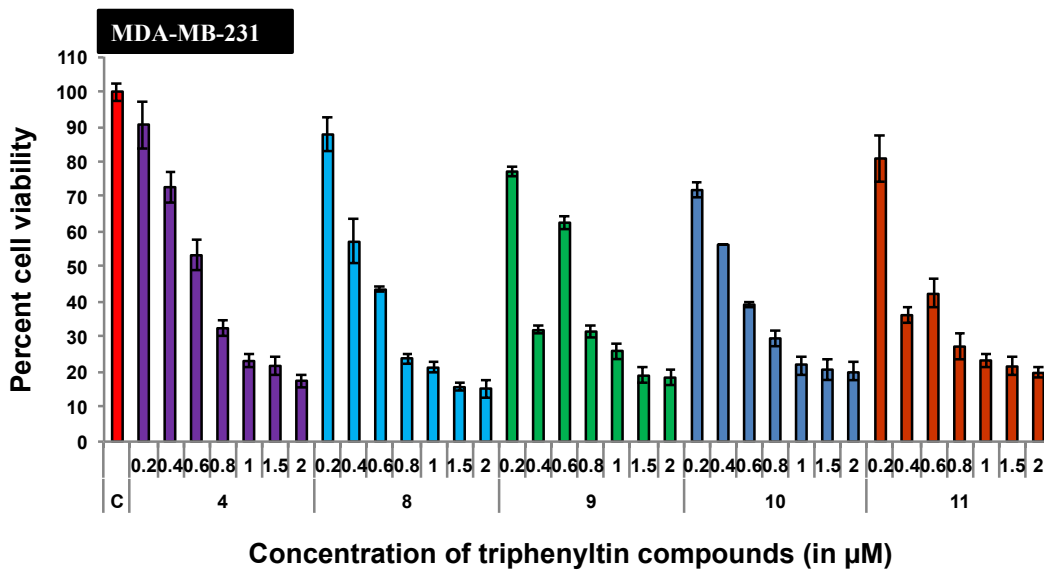

**Figure S8.** Bar representations of dose dependent cytotoxic effects of compounds 1-11 on MDA-MB-231 cells by MTT assay after incubation with various concentrations of compounds for 24 h. Bars represent  $\pm$  SEM (n = 3).

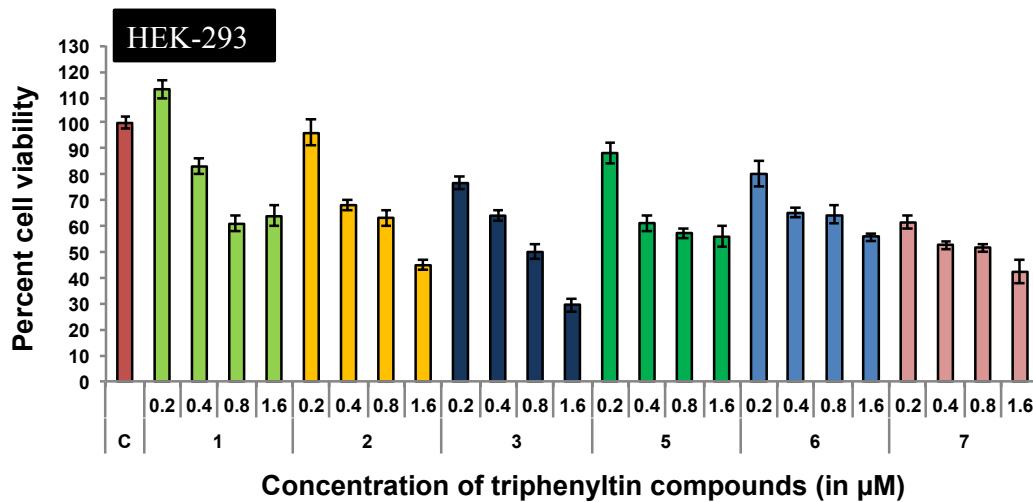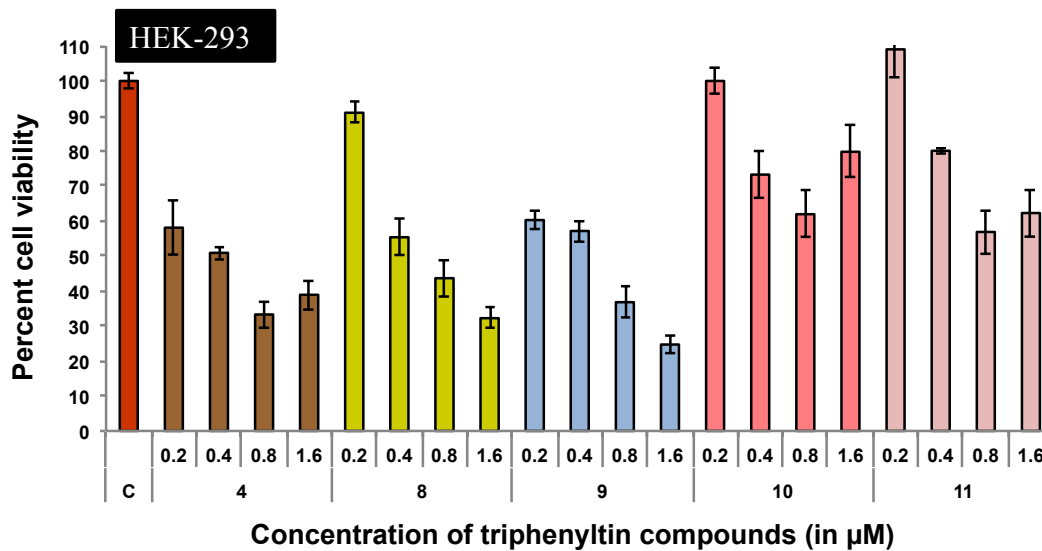

**Figure S9.** Bar representations of dose dependent cytotoxic effects of compounds **1-11** on HEK-293 cells by MTT assay after incubation with various concentrations of compounds for 24 h. Bars represent  $\pm$  SEM (n = 3).

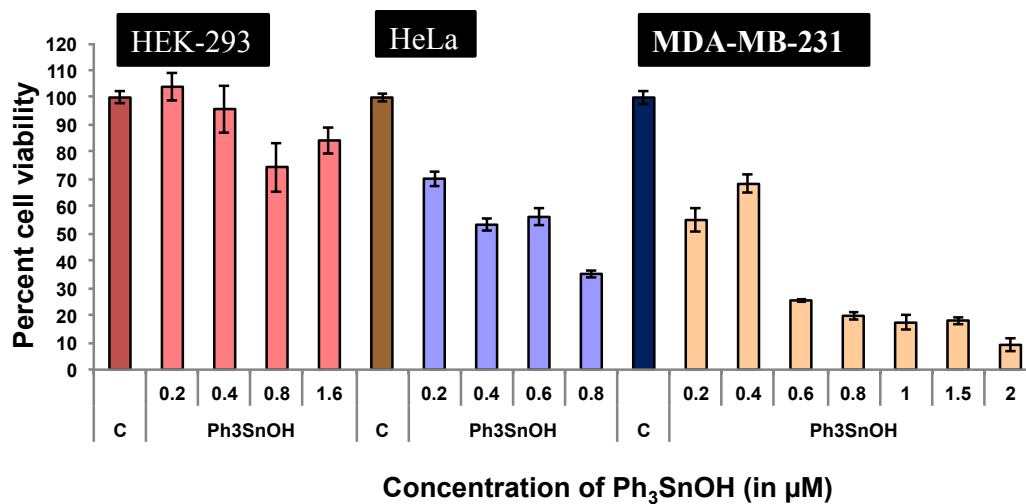

**Figure S10.** Bar representations of dose dependent cytotoxic effects of Ph<sub>3</sub>SnOH on normal cells HEK-293 and cancer cells HeLa and MDA-MB-231 by MTT assay after incubation with various concentrations of compounds for 24 h. Bars represent  $\pm$  SEM (n = 3).

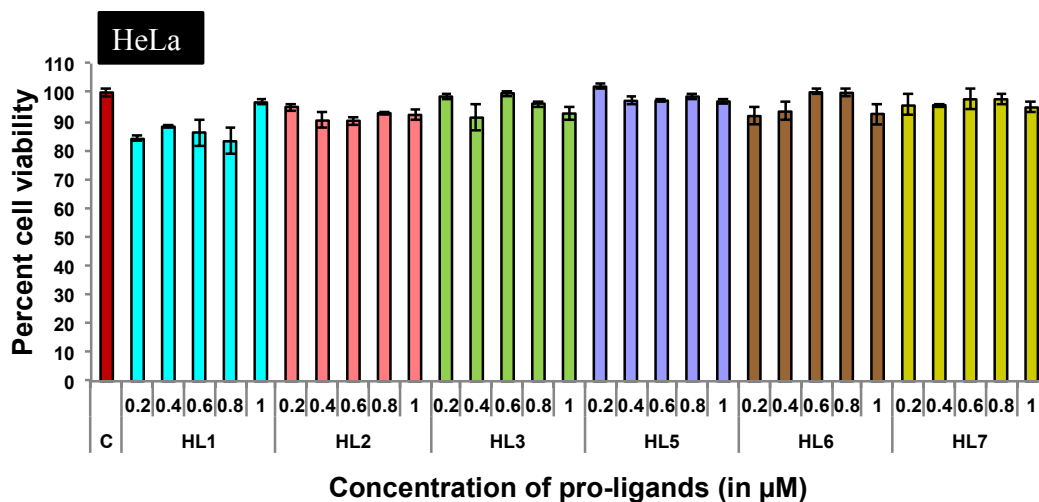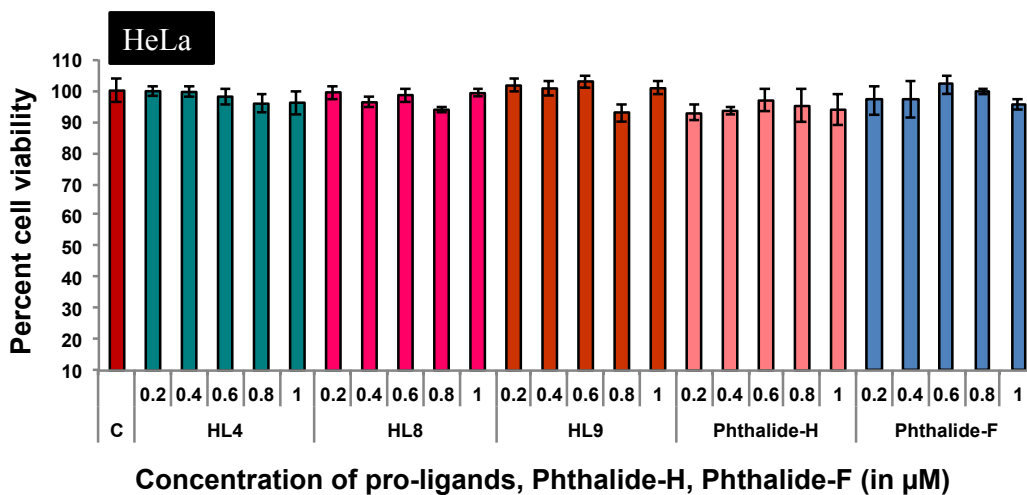

**Figure S11.** Bar representations of dose dependent cytotoxic effects of Pro-ligands HL<sup>1</sup>-HL<sup>9</sup>, Phthalide-H and Phthalide-F on HeLa cells by MTT assay after incubation with various concentrations of compounds for 24 h. Bars represent  $\pm$  SEM (n = 3).

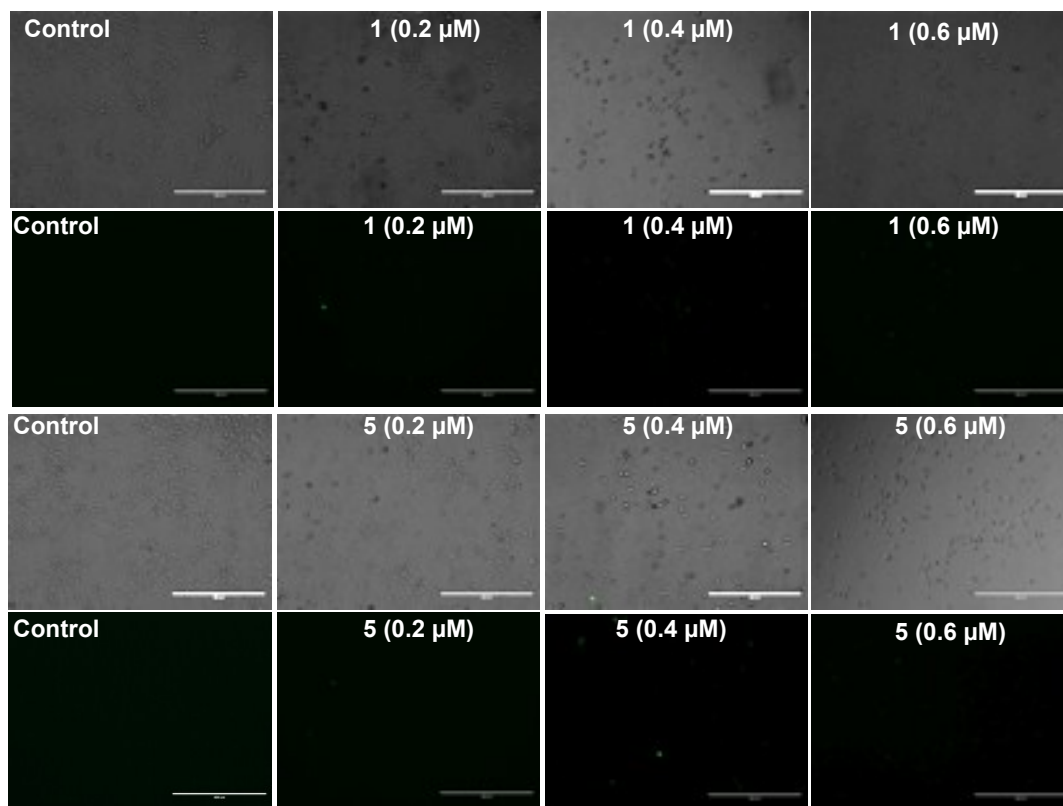

**Figure S12.** Dose-dependent generations of ROS through DCFH-DA fluorescence staining dye after 24h treatment with  $\text{IC}_{50}$  concentrations of **1** and **5** in HEK 293 cells detected by measuring the fluorescence intensity viewed through fluorescence microscope.



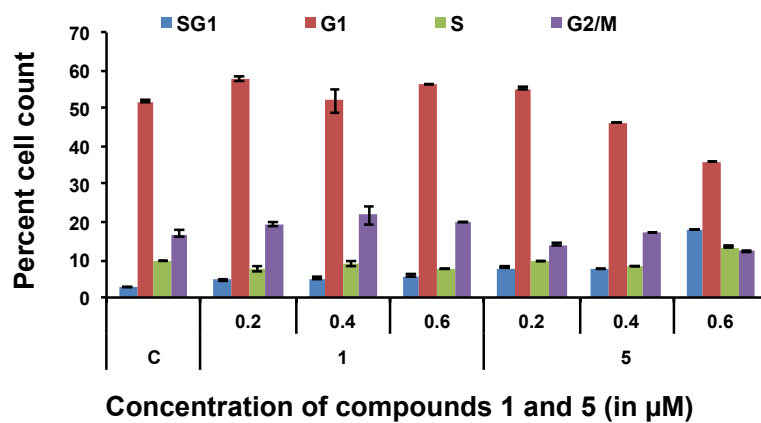

**Figure S13.** The data indicated in the histogram refers to the percentage of cells in each phase of the cell cycle.
